# Supplementary material for: Infection-Induced Intestinal Dysbiosis Is Mediated by Macrophage Activation and Nitrate Production
Source: PubMed Central journal article supplement (PMC6538788; doi:10.1128/mbio.00935-19), 2019-05-28
Supplement: mBio.00935-19-s0001.pdf [file mBio.00935-19-s0001.pdf]

## Supplementary File 2

### Detection of iNOS expression in macrophages of LysM-Stat1<sup>-/-</sup> mice

Infections with *T. gondii* tachyzoites were performed using the Prugniaud (Pru) strain engineered to express the fluorescent protein tdTomato as previously described (1). These parasites were maintained *in vitro* by serial passage through human foreskin fibroblasts in parasite culture medium (DMEM [Invitrogen, Carlsbad, CA], 20% media M199 [Invitrogen], 10% FBS [Serum Source International, Charlotte, NC], 1% penicillin/streptomycin [Invitrogen], 25 µg/mL gentamicin [Gibco]), and were prepared for infection by serial needle passage and filtered through a 5µm pore filter. Parasites were then rinsed with PBS, and mice (STAT1<sup>fl/fl</sup> and LysM-Stat1<sup>-/-</sup>) were infected intraperitoneally with 1×10<sup>4</sup> live, invasion competent parasites. The immune response in these mice was examined at 5 days post-infection. Single-cell suspensions were prepared from peritoneal exudate cells (PECs) by a peritoneal wash with 8 ml ice-cold PBS. PECs were then re-suspended in complete RPMI (RPMI with 10% FCS, 1% penicillin-streptomycin, 1 mM sodium pyruvate, 1% nonessential amino acids [Gibco], and 0.1% -mercaptoethanol). Cells for staining (2×10<sup>6</sup>) were washed with flow cytometry buffer (PBS, 1% bovine serum albumin [BSA] [Sigma-Aldrich], 2 mM EDTA [Life Technologies]) and blocked in 10 µl Fc block solution (flow cytometry buffer, 1 g/ml anti-CD16/32 2.4G2, 1 g/ml normal rat IgG [Life Technologies]) containing Live/Dead Fixable Aqua dead cell stain (Life Technologies) at 4°C for 10 min. Cells were then stained in 50 µl at 4°C for 15 to 20 min and washed in flow cytometry buffer for acquisition by LSR Fortessa. Antibodies used included anti-CD102-FITC (Biolegend, clone 3C4), anti-CD3-peridinin chlorophyll protein (PerCp)-Cy5.5 (ThermoFisher, clone 145-2C11), anti-CD19-PerCp-Cy5.5 (Biolegend, clone 1D3/CD19), anti-B220-PerCp-Cy5.5 (Biolegend, clone RA3-6B2), anti-NK1.1-PerCp-Cy5.5 (Biolegend, clone PK136), anti-Ly6G-PacBlue (Biolegend, clone 1A8), anti-CD115-Brilliant Violet (BV)-605 (Biolegend, clone AFS98), anti-CD11b-BV650 (Biolegend, clone M1/70), anti-major histocompatibility complex II (MHCII)-BV711 (Biolegend, clone M5/114.15.2), anti-CX3CR1-BV785 (Biolegend, clone SA011F11), anti-NOS2-allophycocyanin (APC) (eBioscience, clone CXNFT), anti-CD11c-APC-R700 (BD Biosciences, clone N418), anti-Ly6C-APC-eFluor780 (ThermoFisher, clone HK1.4), and anti-CD64-phycoerythrin (PE)-Cy7 (Biolegend, clone X54-5/7.1). Results were analyzed using FlowJo 10.1 software.

## Bibliography

1. John B, Harris TH, Tait ED, Wilson EH, Gregg B, Ng LG, Mrass P, Roos DS, Dzierszinski F, Weninger W, Hunter CA. 2009. Dynamic Imaging of CD8(+) T cells and dendritic cells during infection with *Toxoplasma gondii*. *PLoS Pathog* 5:e1000505.
