# Supplementary material for: Infection-Induced Intestinal Dysbiosis Is Mediated by Macrophage Activation and Nitrate Production
Source: PubMed Central journal article supplement (PMC6538788; doi:10.1128/mbio.00935-19), 2019-05-28
Supplement: mBio.00935-19-st001.pdf [file mBio.00935-19-st001.pdf]

**Supplementary File 1. Phyla with differential abundances in naive mice versus *T. gondii* infected mice (day 7) (FDR <0.05).**

| <b>Phylum</b>   | <b>baseMean</b> | <b>log2FoldChange</b> | <b>lfcSE</b> | <b>pvalue</b> | <b>FDR</b>  |
|-----------------|-----------------|-----------------------|--------------|---------------|-------------|
| Verrucomicrobia | 2248.253213     | -4.512062566          | 1.323598016  | 0.000652165   | 0.003043436 |
| Firmicutes      | 13675.66782     | -1.806365227          | 0.777674036  | 0.020191007   | 0.070668523 |
| Fusobacteria    | 215.4560698     | 2.273043736           | 0.533646939  | 2.05E-05      | 0.00014345  |
| Proteobacteria  | 13886.28784     | -5.488306833          | 0.638562239  | 8.34E-18      | 1.17E-16    |
